# Supplementary material for: Bright sky-blue fluorescence with high color purity: assembly of luminescent diphenyl-anthracene lutetium-based coordination polymer
Source: Royal Society of Chemistry journal article supplement (doi:10.1039/d0ra10795f), 2021-01-01
Supplement: d0ra10795f1.pdf [file d0ra10795f1.pdf]

## S1. Experimental section

**General Methods:**  $^1\text{H-NMR}$  spectra were recorded in  $\text{CDCl}_3$  on a JEOL ECS-400 (400 MHz) spectrometer;  $\text{CHCl}_3$  ( $\delta_{\text{H}} = 7.26$  ppm) was used as the internal reference. Electrospray ionization (ESI) mass spectrometry was performed using JEOL JMS-T100 LP instrument. Elemental analyses were performed using MICRO CORDER JM10. Luminescence spectra for DPA-P and  $[\text{Lu}(\text{hfa})_3\text{DPA-P}]_n$  were measured using a Horiba FluoroLog®3 spectrofluorometer. Emission quantum yields for DPA-P and  $[\text{Lu}(\text{hfa})_3\text{DPA-P}]_n$  were measured using a FP-6300 spectrofluorometer with an integration sphere (ILF-533). The emission lifetimes were measured by a streak camera system (Streakscope C10627, Hamamatsu). Diffuse-reflection spectra were recorded with a JASCO V-670 spectrophotometer equipped with an integrating-sphere unit (JASCO ISN-723).

**Materials:** Magnesium sulfate, anhydrous (>98.0% (titration)) and chloroform- $d_1$  (99.8%) were purchased from Kanto Chemical Co., Inc. Potassium acetate (Guaranteed Reagent) and lutetium(III) acetate tetrahydrate (99.9 %) was purchased from Wako Pure Chemical Industries, Ltd. 2,6-Dibromo-9,10-diphenylanthracene (> 98.0%), diphenylphosphine (> 90.0 % (GC)), and palladium(II) acetate (> 98.0%) were purchased from Tokyo Chemical Industry Co., Ltd.

**Preparation of [9,10-diphenyl-anthracene-2,6-diyl]bis(diphenylphosphine) oxide (DPA-P, Fig. S1, Scheme 1):** A solution of potassium acetate (333 mg, 1.8 mmol) and palladium acetate (3.0 mg, 0.013 mmol) were added dropwise to a solution of 2,6-dibromo-9,10-diphenylanthracene (500 mg, 1.02 mmol) in dry DMA (15 mL). Diphenylphosphine (0.5 ml, 2.04 mmol) was then added to the solution, which was subsequently stirred for 24 h at  $100^\circ\text{C}$ . Then 120 mL of water was added to the solution and the obtained powder was filtrated. The product powder was dissolved in  $\text{CH}_2\text{Cl}_2$  (100

mL) and a 30% H<sub>2</sub>O<sub>2</sub> aqueous solution (2 mL) was added to the solution. The reaction mixture was stirred for 5 h. The product was extracted using CHCl<sub>3</sub> and washed with distilled water. The solvent was then evaporated to produce a powder. The recrystallization was performed using CH<sub>2</sub>Cl<sub>2</sub>/MeOH solvent (Yield: 210mg, 28%).

<sup>1</sup>H-NMR (400 MHz, CDCl<sub>3</sub>) δ/ppm = 7.91 (d, 2H, J = 16.0 Hz), 7.79 (dd, 2H, J = 11.6 Hz), 7.29-7.61 (m, 32H); ESI-MS: m/z calcd. for C<sub>50</sub>H<sub>37</sub>O<sub>2</sub>P<sub>2</sub>, [M+H]<sup>+</sup> = 731.22; found: 731.23; elemental analysis calcd. (%) for C<sub>50</sub>H<sub>36</sub>O<sub>2</sub>P<sub>2</sub>, C 82.18, H 4.97; found: C 82.40, H 4.76.

FT-IR(ATR) = 1188 (st, P=O) cm<sup>-1</sup>.

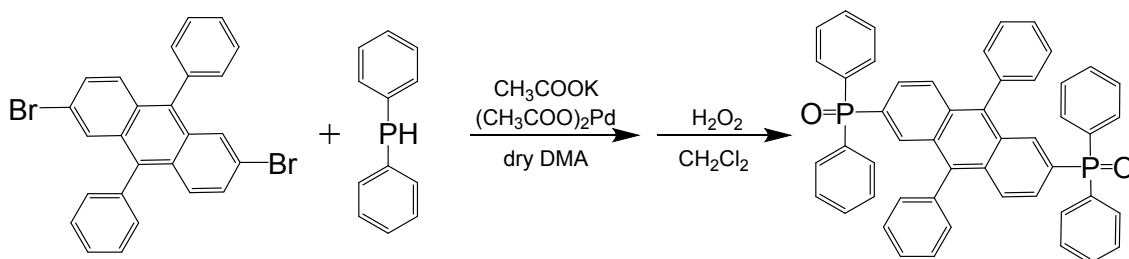

**Scheme 1.** Synthesis of **DPA-P** ligand.

**Preparation of [Lu(hfa)<sub>3</sub>DPA-P]<sub>n</sub> (Fig. S1):** Methanol solution (0.5 mL) containing Lu(hfa)<sub>3</sub>(H<sub>2</sub>O)<sub>2</sub> (7 mg, 0.01 mmol) and CH<sub>2</sub>Cl<sub>2</sub> solution (0.5 mL) containing DPA-P (200 mg, 0.35 mmol) were prepared, respectively. The methanol solution is added to microtube, and the CH<sub>2</sub>Cl<sub>2</sub> solution is added to microtube slowly. Liquid-liquid diffusion-assisted crystallization from CH<sub>3</sub>OH (Lu(hfa)<sub>3</sub>(H<sub>2</sub>O)<sub>2</sub>)/ CH<sub>2</sub>Cl<sub>2</sub> (DPA-P ligand) solution gave crystals.

Elemental analysis calcd. (%) for C<sub>65</sub>H<sub>39</sub>F<sub>18</sub>O<sub>8</sub>P<sub>2</sub>Lu, C 51.13, H 2.57; found: C 50.82, H 2.44. FT-IR(ATR) = 1655 (st, C=O), 1249 (st, C-F), 1169 (st, P=O) cm<sup>-1</sup>.

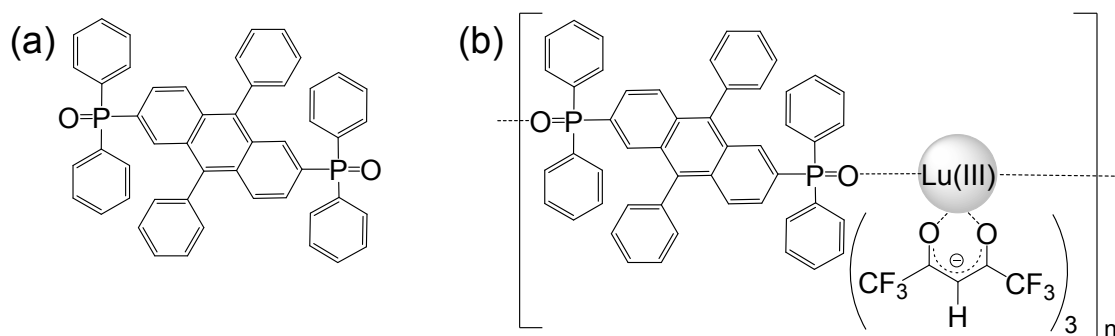

**Fig. S1.** Chemical structures of DPA-P (a) and  $[\text{Lu}(\text{hfa})_3\text{DPA-P}]_n$  (b).

**Single-Crystal X-ray Structure Determination:** X-ray crystal structures and crystallographic data for DPA-P and  $[\text{Lu}(\text{hfa})_3\text{DPA-P}]$  obtained by the recrystallization process using the  $\text{CH}_3\text{OH}$  ( $\text{Lu}(\text{hfa})_3(\text{H}_2\text{O})_2$ ) /  $\text{CH}_2\text{Cl}_2$  (DPA-P ligand) solvent system are shown in Fig. 2 and Table S1. X-ray crystal structures and crystallographic data for  $[\text{Lu}(\text{hfa})_3\text{DPA-P}]$  obtained by the recrystallization process using the  $\text{CHCl}_3$  ( $\text{Lu}(\text{hfa})_3(\text{H}_2\text{O})_2$ ) /  $\text{CH}_2\text{Cl}_2$  (DPA-P ligand) solvent system is shown in Fig. S5 and Table S3. Single crystals of the compounds were mounted on micromesh (MiTeGen M3-L19–25L) using paraffin oil. Measurements were made by using a Rigaku RAXIS RAPID imaging-plate area detector or XtaLAB AFC11 (RCD3) with graphite-monochromated  $\text{Mo-K}\alpha$  radiation. Non-hydrogen atoms were anisotropically refined. All calculations were performed using a crystal-structure crystallographic software package. The CIF data were confirmed by the check CIF/PLATON service. CCDC-2046734 (for DPA-P), CCDC-2046736 (for  $[\text{Lu}(\text{hfa})_3\text{DPA-P}]_n$  obtained by the recrystallization process using the  $\text{CH}_3\text{OH}/\text{CH}_2\text{Cl}_2$  solvent system), and CCDC-2058490 (for  $[\text{Lu}(\text{hfa})_3\text{DPA-P}]_n$  obtained by the recrystallization process using the  $\text{CHCl}_3/\text{CH}_2\text{Cl}_2$  solvent system) contain the supplementary crystallographic data for this paper. These data can be obtained free of charge from The Cambridge Crystallographic Data Centre via [www.ccdc.cam.ac.uk/data\\_request/cif](http://www.ccdc.cam.ac.uk/data_request/cif).

## S2. X-ray crystal data

**Table. S1** Crystallographic data for DPA-P and [Lu(hfa)<sub>3</sub>DPA-P]<sub>n</sub> obtained by the recrystallization process using the CH<sub>3</sub>OH/CH<sub>2</sub>Cl<sub>2</sub> solvent system.

|                              | DPA-P                                                         | [Lu(hfa) <sub>3</sub> DPA-P] <sub>n</sub>                                                                |
|------------------------------|---------------------------------------------------------------|----------------------------------------------------------------------------------------------------------|
| chemical                     | C <sub>50</sub> H <sub>36</sub> O <sub>2</sub> P <sub>2</sub> | C <sub>65</sub> H <sub>39</sub> F <sub>18</sub> LuO <sub>8</sub> P <sub>2</sub><br>[+CH <sub>3</sub> OH] |
| formula weight               | 730.73                                                        | 1526.87                                                                                                  |
| crystal system               | monoclinic                                                    | monoclinic                                                                                               |
| space group                  | <i>P</i> 2 <sub>1</sub> / <i>n</i>                            | <i>P</i> 2 <sub>1</sub> / <i>c</i>                                                                       |
| a / Å                        | 10.7593(3)                                                    | 18.1201(3)                                                                                               |
| b / Å                        | 10.8776(3)                                                    | 13.7081(2)                                                                                               |
| c / Å                        | 16.3514(4)                                                    | 25.8676(4)                                                                                               |
| volume / Å <sup>3</sup>      | 1851.62(9)                                                    | 6415.04(17)                                                                                              |
| Z                            | 2                                                             | 4                                                                                                        |
| density / g cm <sup>-3</sup> | 1.311                                                         | 1.581                                                                                                    |
| Temperature / °C             | -150                                                          | -150                                                                                                     |
| <i>R</i>                     | 0.0407                                                        | 0.0351                                                                                                   |
| <i>wR</i> <sub>2</sub>       | 0.1112                                                        | 0.1282                                                                                                   |

## S3. Shape measure calculation

To clarify the polyhedral structure, we calculated continuous shape measures. The continuous shape measure factor, *S*, was calculated to estimate the degree of distortion in the first coordination sphere of the coordination structure based on the crystal structure data. The *S* value is given by the following equation,

$$S = \min \frac{\sum_k^N |Q_k - P_k|^2}{\sum_k^N |Q_k - Q_0|^2} \times 100,$$

where *Q<sub>k</sub>* represents the vertices of the actual structure, *Q<sub>0</sub>* is the center of mass of the actual structure, *N* is the number of vertices, and *P<sub>k</sub>* represents the vertices of the ideal structure. Based on the shape measure calculation, [Lu(hfa)<sub>3</sub>DPA-P]<sub>n</sub> was categorized as having SAP coordination geometry (*S* = 0.844).

**Table S2.** Shape measure calculation results

|                                           | SAP( $D_{4d}$ ) | TDH( $D_{2d}$ ) | BTP( $C_{2v}$ ) |
|-------------------------------------------|-----------------|-----------------|-----------------|
| $[\text{Lu}(\text{hfa})_3\text{DPA-P}]_n$ | 0.844           | 1.529           | 1.588           |

S4. The X-ray crystal structure views of the  $[\text{Lu}(\text{hfa})_3\text{DPA-P}]_n$  obtained by the recrystallization process using the  $\text{CH}_3\text{OH}/\text{CH}_2\text{Cl}_2$  solvent system

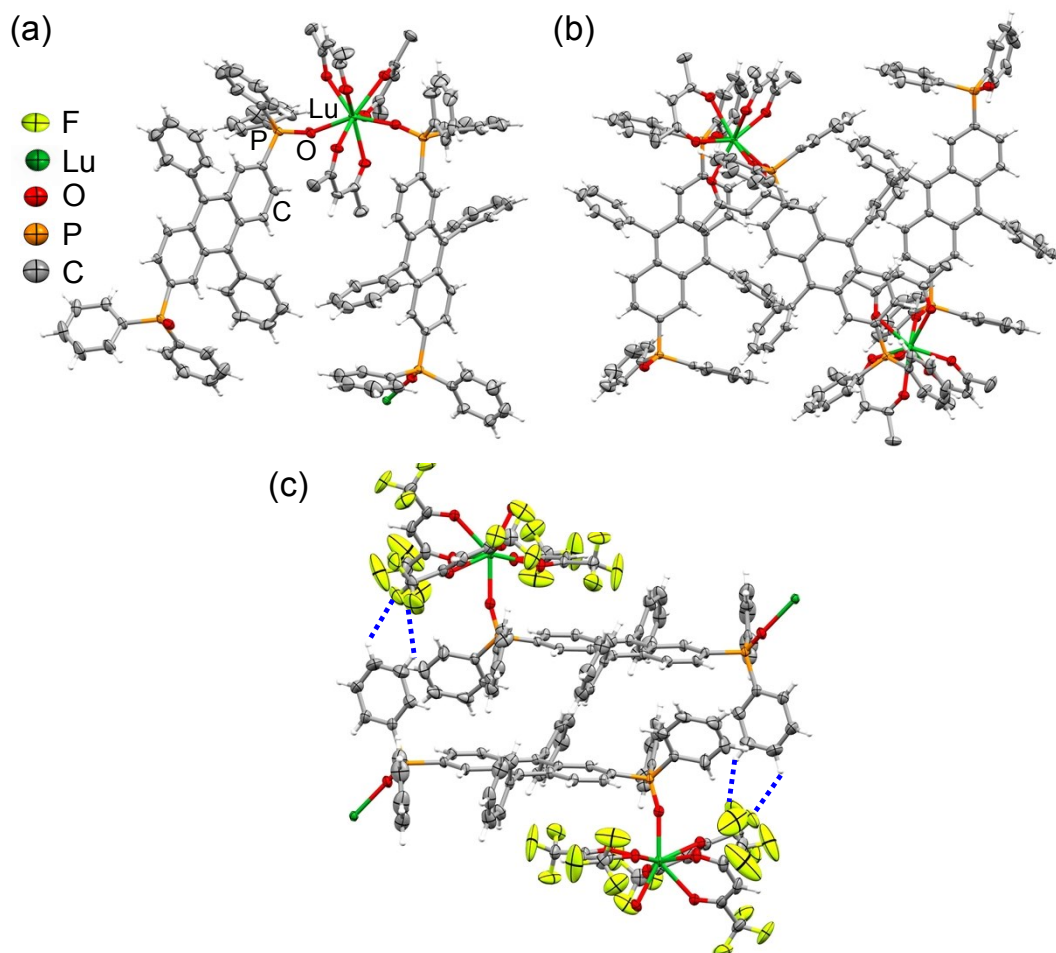

**Fig. S2.** The X-ray crystal structures of the  $[\text{Lu}(\text{hfa})_3\text{DPA-P}]_n$  obtained by the recrystallization process using the  $\text{CH}_3\text{OH}/\text{CH}_2\text{Cl}_2$  solvent system (a:  $\text{Lu}(\text{hfa})_3(\text{DPA-P})_2$  without F atom, b:  $\text{Lu}_2(\text{hfa})_6(\text{DPA-P})_3$  without F atom; c: Packing structure in  $[\text{Lu}(\text{hfa})_3\text{DPA-P}]_n$  (Blue broken line: CH-F interaction).

### S5. Emission lifetimes

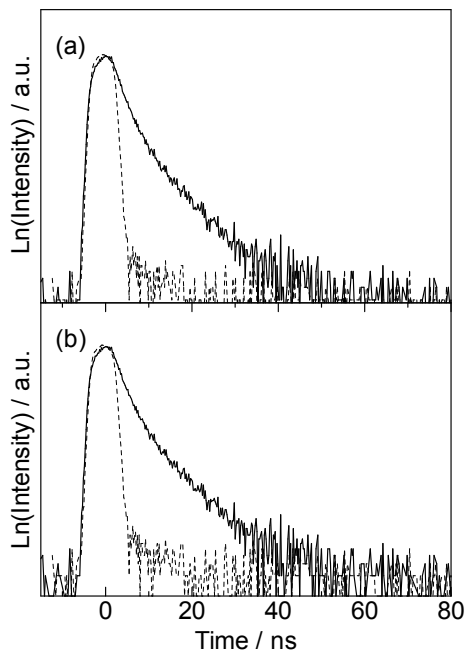

**Fig. S3.** Emission decay curves of DPA-P (a, solid line) and  $[\text{Lu}(\text{hfa})_3\text{DPA-P}]_n$  (b, solid line) obtained by the recrystallization process using the  $\text{CH}_3\text{OH}/\text{CH}_2\text{Cl}_2$  solvent system, and prompt curves (a, b, broken line).

### S6. CIE (x, y) chromaticity coordinate

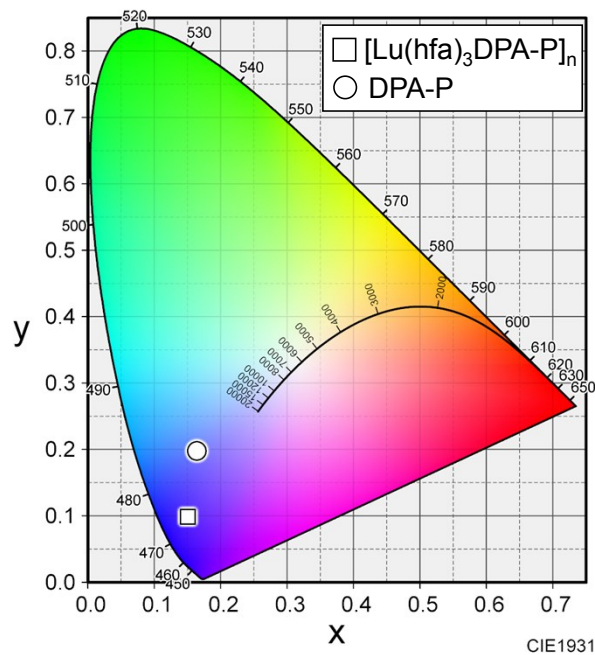

**Fig. S4.** CIE (x, y) chromaticity coordinates for DPA-P and  $[\text{Lu}(\text{hfa})_3\text{DPA-P}]_n$  obtained by the recrystallization process using the  $\text{CH}_3\text{OH}/\text{CH}_2\text{Cl}_2$  solvent system

**S7. Crystal structure of [Lu(hfa)<sub>3</sub>DPA-P]<sub>n</sub> obtained by the recrystallization process using the CHCl<sub>3</sub>/CH<sub>2</sub>Cl<sub>2</sub> solvent system**

We also prepared single crystals of [Lu(hfa)<sub>3</sub>DPA-P]<sub>n</sub> by recrystallization from the CHCl<sub>3</sub>/CH<sub>2</sub>Cl<sub>2</sub> solvent system (Fig S5). The crystal was identified by elemental analysis (C<sub>65</sub>H<sub>39</sub>F<sub>18</sub>O<sub>8</sub>P<sub>2</sub>Lu calcd for C 51.13, H 2.57, found: C 50.87, H 2.47). The structure of the obtained crystal (Fig. S5, Table S3) is different from that of the single crystals obtained by recrystallization from the CH<sub>3</sub>OH/CH<sub>2</sub>Cl<sub>2</sub> solvent system (Fig. 2b, Table S1). The structure of the [Lu(hfa)<sub>3</sub>DPA-P]<sub>n</sub> crystal obtained from the CHCl<sub>3</sub>/CH<sub>2</sub>Cl<sub>2</sub> solvent system belongs to the P2<sub>1</sub> space group (Table S3). The CH–F interactions (< 3.0 Å) between the hfa unit and the aromatic DPA-P ligands were also observed in the [Lu(hfa)<sub>3</sub>DPA-P]<sub>n</sub> (Fig. S5).

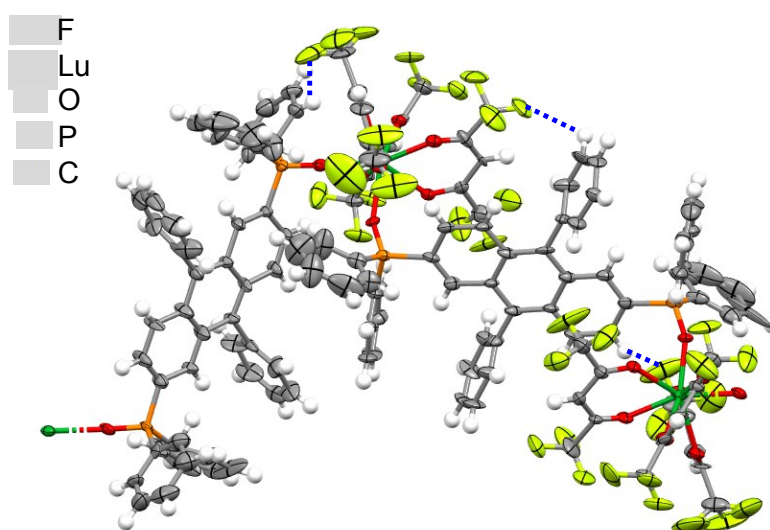

**Fig. S5.** X-ray crystal structure of [Lu(hfa)<sub>3</sub>DPA-P]<sub>n</sub> obtained by recrystallization from the CHCl<sub>3</sub>/CH<sub>2</sub>Cl<sub>2</sub> solvent system.

**Table. S3** Crystallographic data for [Lu(hfa)<sub>3</sub>DPA-P]<sub>n</sub> obtained by the recrystallization process using the CHCl<sub>3</sub>/CH<sub>2</sub>Cl<sub>2</sub> solvent system.

|                              | [Lu(hfa) <sub>3</sub> DPA-P] <sub>n</sub>                                                                                |
|------------------------------|--------------------------------------------------------------------------------------------------------------------------|
| chemical                     | C <sub>130</sub> H <sub>78</sub> F <sub>36</sub> Lu <sub>2</sub> O <sub>16</sub> P <sub>4</sub><br>[+CHCl <sub>3</sub> ] |
| formula weight               | 3053.75                                                                                                                  |
| crystal system               | monoclinic                                                                                                               |
| space group                  | <i>P</i> 2 <sub>1</sub>                                                                                                  |
| a / Å                        | 21.8457(5)                                                                                                               |
| b / Å                        | 15.3407(2)                                                                                                               |
| c / Å                        | 23.4512(6)                                                                                                               |
| volume / Å <sup>3</sup>      | 7800.4(3)                                                                                                                |
| Z                            | 2                                                                                                                        |
| density / g cm <sup>-3</sup> | 1.394                                                                                                                    |
| Temperature / °C             | -150                                                                                                                     |
| <i>R</i>                     | 0.0530                                                                                                                   |
| <i>wR</i> <sub>2</sub>       | 0.1417                                                                                                                   |

The emission and excitation spectra are shown in Fig. S6. The FWHM is estimated to be 63 nm and is narrower than that of the DPA-P ligand (77 nm). The emission quantum yield upon excitation at 380 nm is estimated to be 30% and is higher than that of the DPA-P ligand (18%). The results also support our concept; the characteristic lanthanide fixation system improved the emission color purity and emission quantum yield.



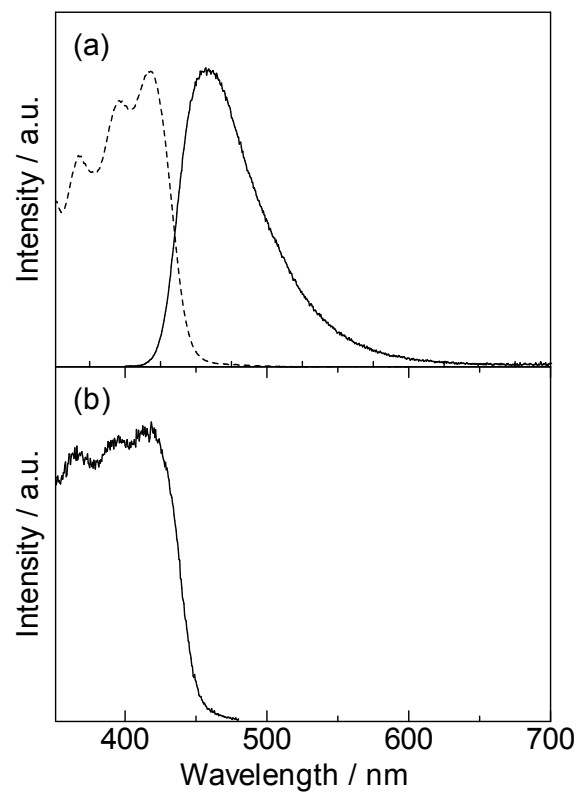

**Fig. S6.** (a) Absorption (broken line), emission (solid line), and (b) excitation (solid line) spectra of  $[\text{Lu}(\text{hfa})_3\text{DPA-P}]_n$  in their solid states, which is obtained by the recrystallization process using the  $\text{CHCl}_3/\text{CH}_2\text{Cl}_2$  solvent system. The samples were 3000-fold dilution using KBr.
